# Supplementary material for: The Role of a Cholecystokinin Receptor Antagonist in the Management of Chronic Pancreatitis: A Phase 1 Trial
Source: MDPI journal article supplement (doi:10.3390/pharmaceutics16050611), 2024-04-30
Supplement: s1 [file s1]

Supplemental Data:

## **Role of a Cholecystokinin Receptor Antagonist in the Management of Chronic Pancreatitis: A Phase 1 Trial**

**Supplemental Figure S1:** Representative dissociation curve analysis of qPCR amplification for different microRNAs using total RNA from serum samples from patients.

**Supplemental Table S1:** Raw Ct Data and calculation of Relative expression data from the raw Ct data

miR-185-5p

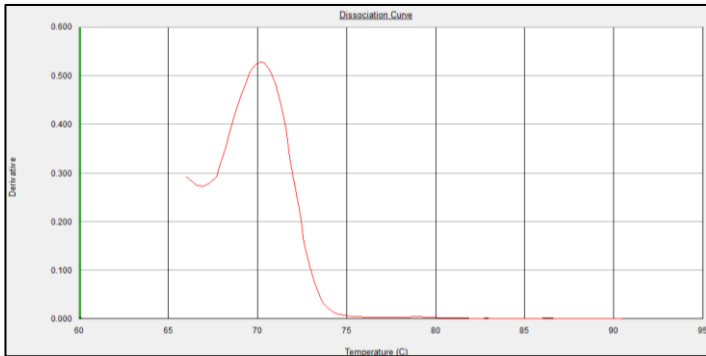

miR-346-5p

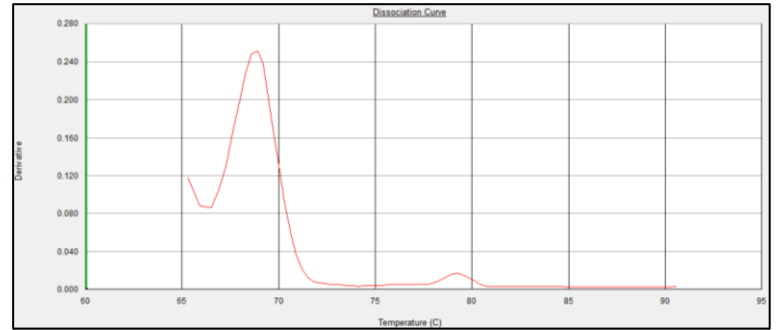

miR-378-3p

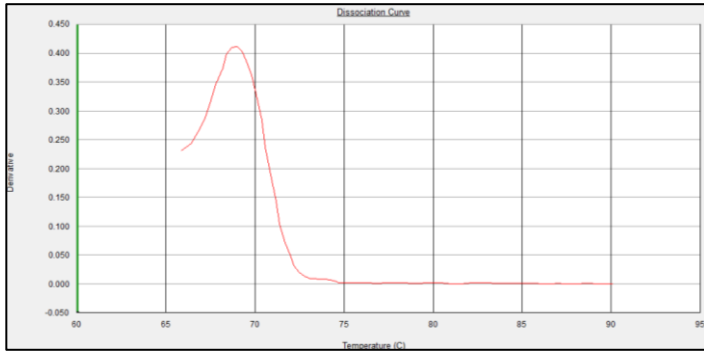

miR-122-5p

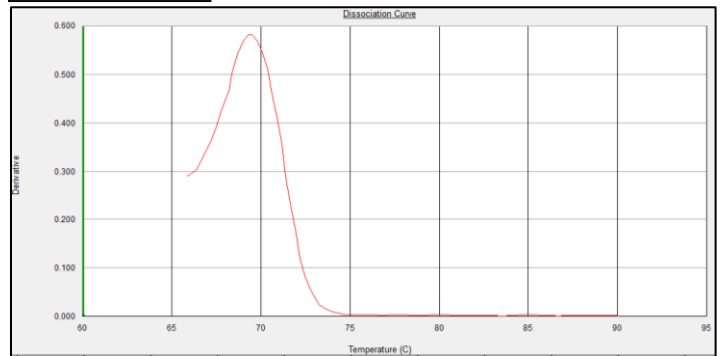

miR-16-5p

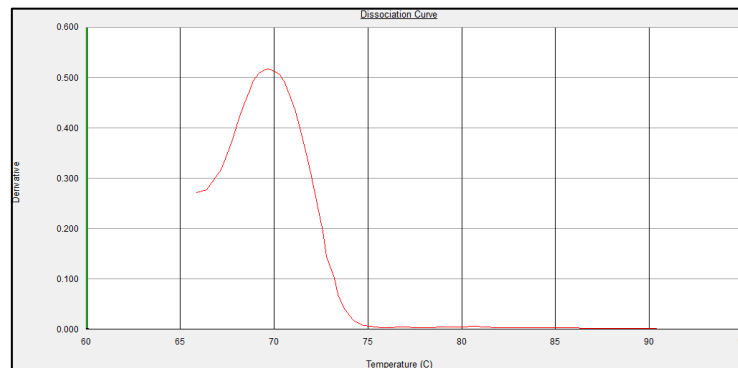

Supplemental Figure S1. Representative dissociation curve analysis of qPCR amplification for different microRNAs using total RNA from serum samples from patients. The figure shows single peak in the dissociation curve analysis in each case indicative of single amplicon formed following PCR amplification (specificity) in case of all genes.

| Supplemental Table S1: Raw Ct Data and calculation of Relative expression data from the raw Ct data |                                                                                                                                                                                 |         |         |         |         |         |         |         |         |         |         |         |
|-----------------------------------------------------------------------------------------------------|---------------------------------------------------------------------------------------------------------------------------------------------------------------------------------|---------|---------|---------|---------|---------|---------|---------|---------|---------|---------|---------|
|                                                                                                     | Ct values of microRNAs in serum samples at baseline level (0) compared to at 12 wks treatment of chronic pancreatitis patients with proglumide                                  |         |         |         |         |         |         |         |         |         |         |         |
| microRNA                                                                                            | 001-0                                                                                                                                                                           | 001-12  | 002-0   | 002-12  | 004-0   | 004-12  | 007-0   | 007-12  | 008-0   | 008-12  | 009-0   | 009-12  |
| miR-185-5p                                                                                          | 27.2155                                                                                                                                                                         | 25.4207 | 23.1836 | 25.4265 | 23.7198 | 23.6912 | 30.5318 | 29.4638 | 30.8696 | 26.9163 | 29.1124 | 25.1734 |
| miR-346-5p                                                                                          | 34.0967                                                                                                                                                                         | 33.1237 | 32.5902 | 33.9895 | 34.2977 | 34.0501 | 35      | 33.3435 | 33.8161 | 30.8934 | 32.7829 | 29.5333 |
| miR-378-3p                                                                                          | 31.0512                                                                                                                                                                         | 29.152  | 27.0553 | 29.4993 | 28.0594 | 27.8252 | 33.022  | 31.837  | 33.1859 | 29.7854 | 33.6097 | 29.3584 |
| miR-122-5p                                                                                          | 28.7648                                                                                                                                                                         | 28.4023 | 26.1191 | 29.1443 | 25.7463 | 26.545  | 30.246  | 30.7687 | 29.424  | 28.4026 | 28.436  | 25.7401 |
| miR-16-5p                                                                                           | 22.6333                                                                                                                                                                         | 21.6134 | 18.6272 | 20.8052 | 19.1048 | 19.429  | 25.9367 | 24.9688 | 25.0683 | 22.3678 | 24.417  | 21.2932 |
|                                                                                                     | Fold change (Relative expression) Fold Change (Relative expression) data were calculated with $\Delta\Delta CT$ method using raw Ct data as described in Materials and Methods) |         |         |         |         |         |         |         |         |         |         |         |
|                                                                                                     | Relative expression of microRNAs in serum samples at baseline level (0) compared to at 12 wks treatment of chronic pancreatitis patients with proglumide                        |         |         |         |         |         |         |         |         |         |         |         |
| microRNA                                                                                            | 001-0                                                                                                                                                                           | 001-12  | 002-0   | 002-12  | 004-0   | 004-12  | 007-0   | 007-12  | 008-0   | 008-12  | 009-0   | 009-12  |
| miR-185-5p                                                                                          | 1                                                                                                                                                                               | 1.71    | 1       | 0.96    | 1       | 1.28    | 1       | 1.08    | 1       | 2.38    | 1       | 1.76    |
| miR-346-5p                                                                                          | 1                                                                                                                                                                               | 0.97    | 1       | 1.72    | 1       | 1.48    | 1       | 1.61    | 1       | 1.17    | 1       | 1.1     |
| miR-378-3p                                                                                          | 1                                                                                                                                                                               | 1.84    | 1       | 0.83    | 1       | 1.46    | 1       | 1.2     | 1       | 1.62    | 1       | 2.18    |
| miR-122-5p                                                                                          | 1                                                                                                                                                                               | 0.63    | 1       | 0.56    | 1       | 0.72    | 1       | 0.36    | 1       | 0.31    | 1       | 0.74    |
|                                                                                                     | miR-16-5p most stably expressed microRNA was used as normalizer                                                                                                                 |         |         |         |         |         |         |         |         |         |         |         |

**Effect of Proglumide administration on microRNA expression in serum of Chronic pancreatitis patients**

|            | 0 wk                 | 12 wk                |          |
|------------|----------------------|----------------------|----------|
| microRNA   | Mean $\pm$ Std Error | Mean $\pm$ Std Error | p value  |
| miR-185-5p | 1 $\pm$ 0            | 1.53 $\pm$ 0.22      | 0.03 *   |
| miR-346-5p | 1 $\pm$ 0            | 1.34 $\pm$ 0.12      | 0.02 *   |
| miR-378-3p | 1 $\pm$ 0            | 1.52 $\pm$ 0.19      | 0.02 *   |
| miR-122-5p | 1 $\pm$ 0            | 0.55 $\pm$ 0.074     | 0.0001 * |

\*=statistically significant

miRNA expression was quantitated using qPCR analysis

miR-16-5p most stably expressed microRNA was used as normalizer
